# Supplementary material for: Integrated genomics analysis highlights important SNPs and genes implicated in moderate-to-severe asthma based on GWAS and eQTL datasets
Source: BMC Pulm Med. 2020 Oct 16;20:270. doi: 10.1186/s12890-020-01303-7 (PMC7568423; doi:10.1186/s12890-020-01303-7)
Supplement: Supplementary file 1 — Additional file 1. [file 12890_2020_1303_MOESM1_ESM.pdf]

# Supplemental Figures

**Supplemental Figure S1. GO-terms of biological process enrichment analysis for 228 identified genes.** The red vertical line represents that the threshold of the P-value after the Bonferroni step down correction.

**Supplemental Figure S2. Violin plots show the expression profiles of identified genes among control, notSA, and SA group. a) for *STAT6*, b) for *MPI*, c) for *GNGT2*, d) for *DECR2*.**

**Supplemental Figure S3. Boxplots show the differential gene expressions between vehicle and various glucocorticoids including VSG158, VSG159, FF, and DEX. a) for *stat6*, b) for *Decr2*, c) for *Slc22a5*, d) for *Lnpep*, e) for *Ttc19*, f) for *Mpi*.**

**Supplemental Figure S4. Co-expression patterns of identified genes between vehicle and various glucocorticoids including VSG158, VSG159, FF, and DEX. a) Co-expression patterns of identified genes in vehicle group; b) Co-expression patterns of identified genes in DEX; c) Co-expression patterns of identified genes in FF; d) Co-expression patterns of identified genes in VSG158; e) Co-expression patterns of identified genes in VSG159.**

**Supplemental Figure S5. Regional plot shows risk SNPs mapped into the severe asthma-associated gene of *GNGT2* based on the GWAS dataset of Dataset #1.**

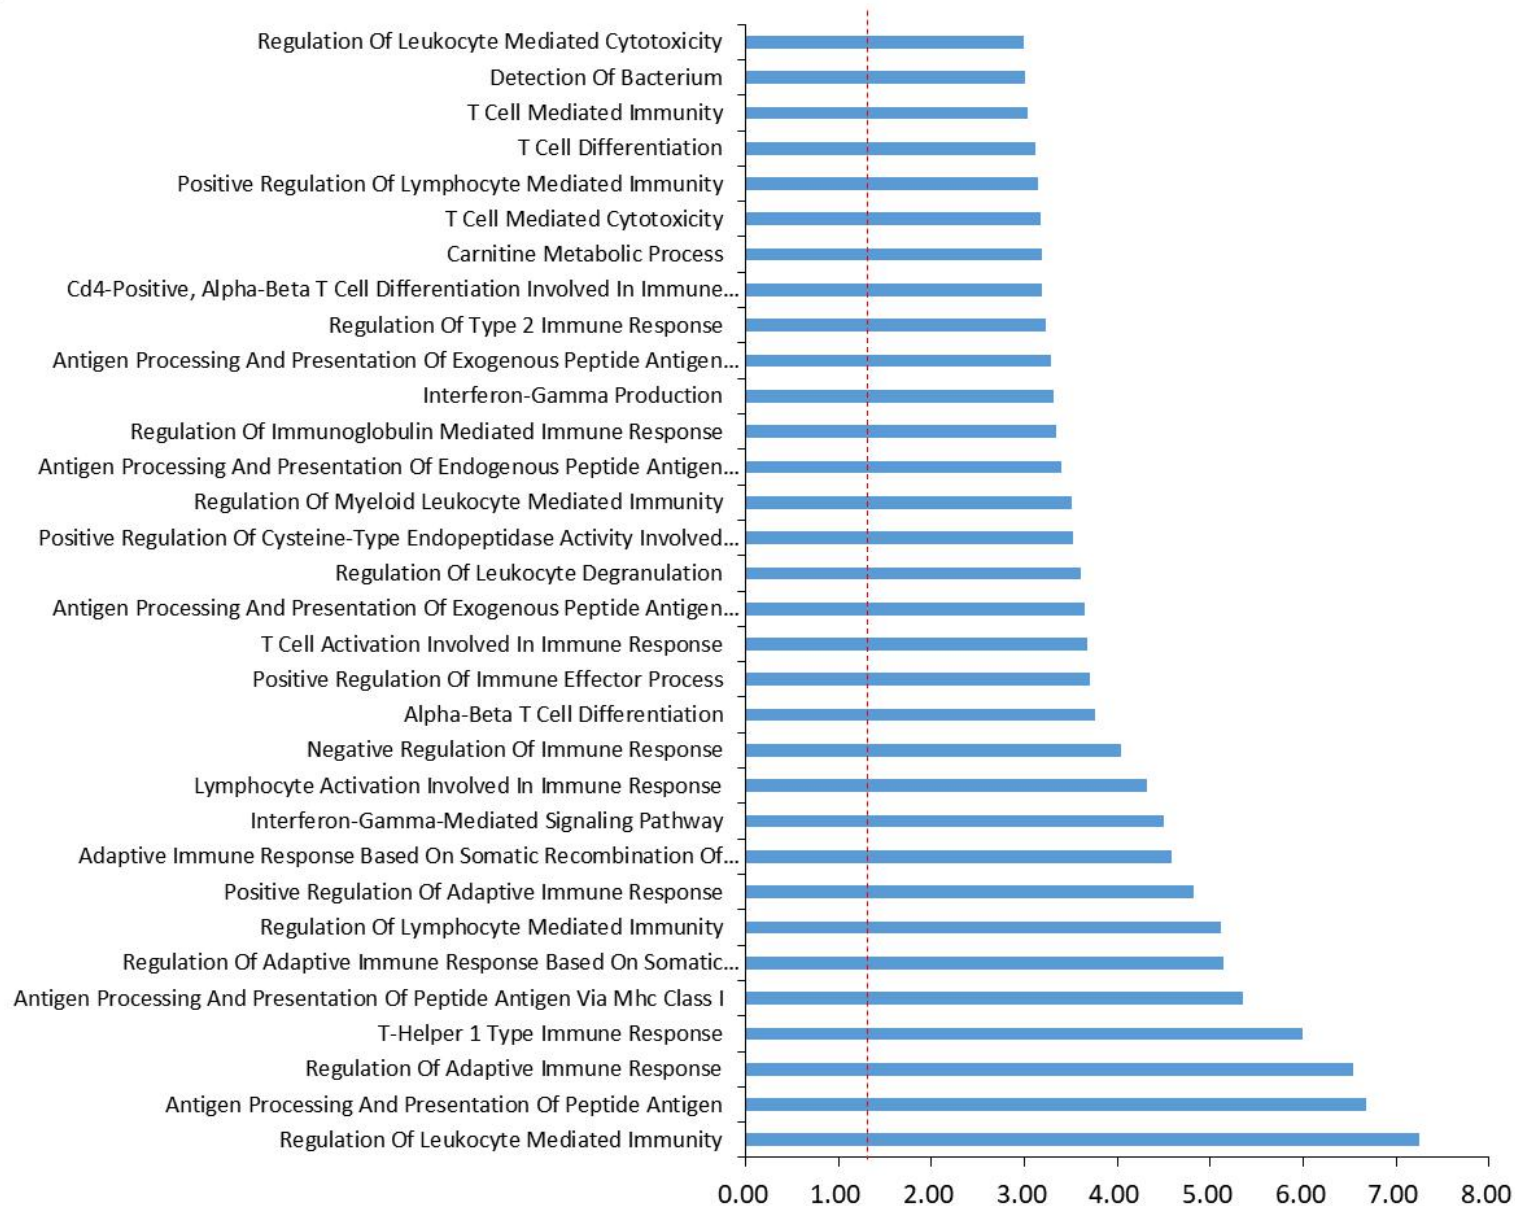

Supplemental Figure S1

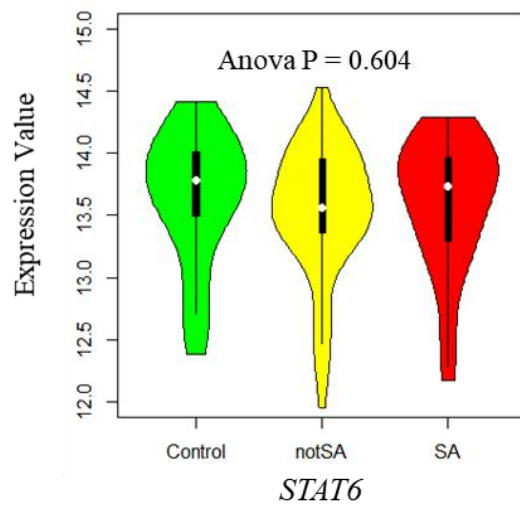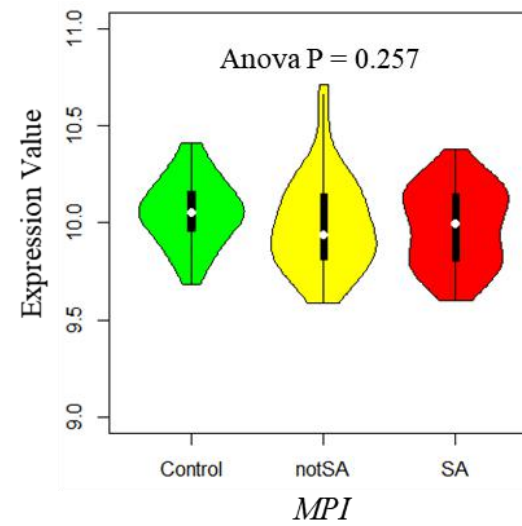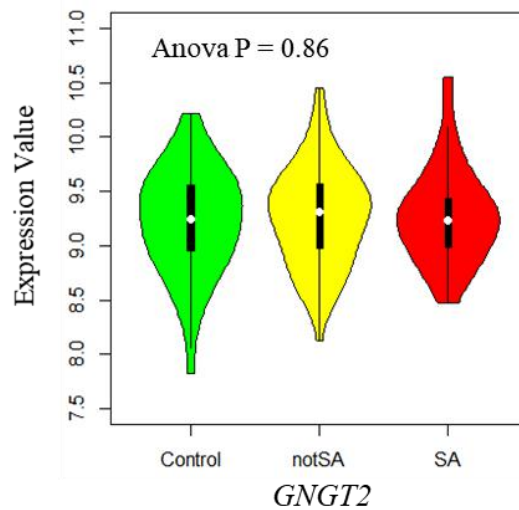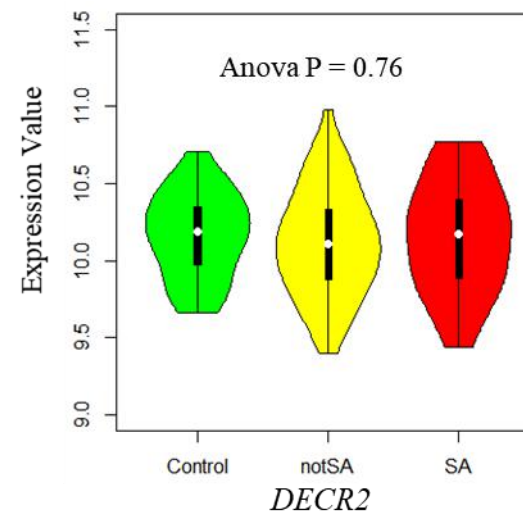

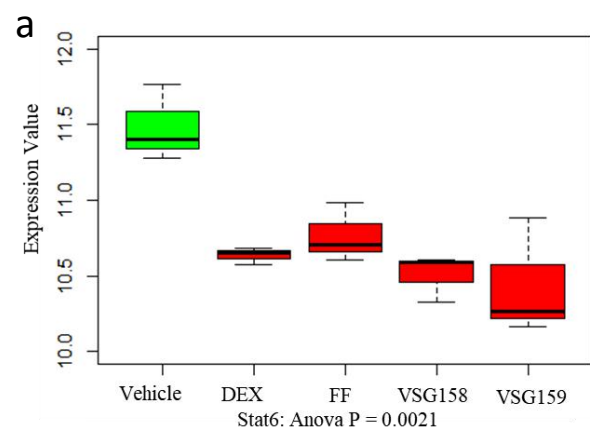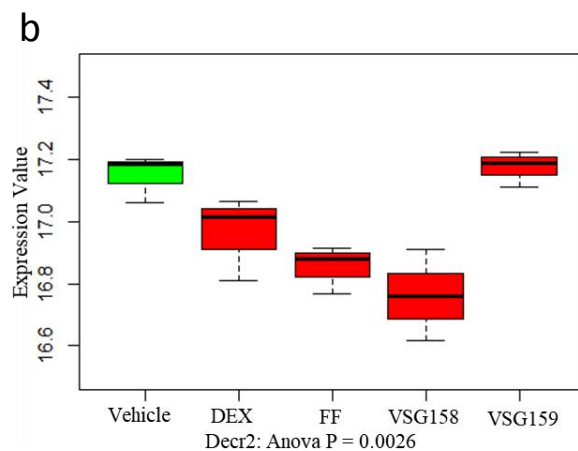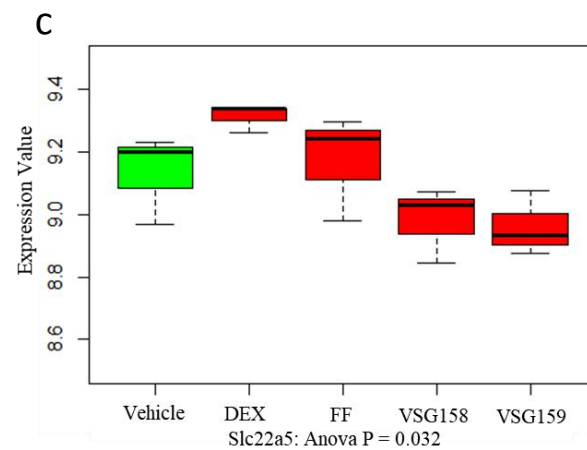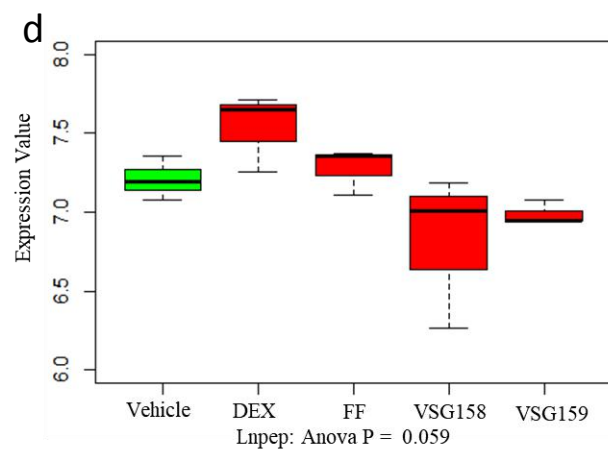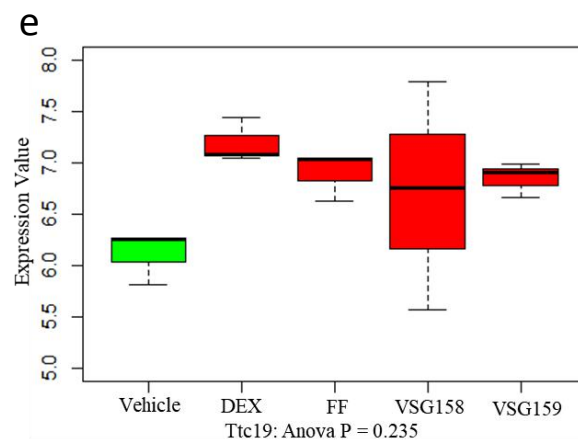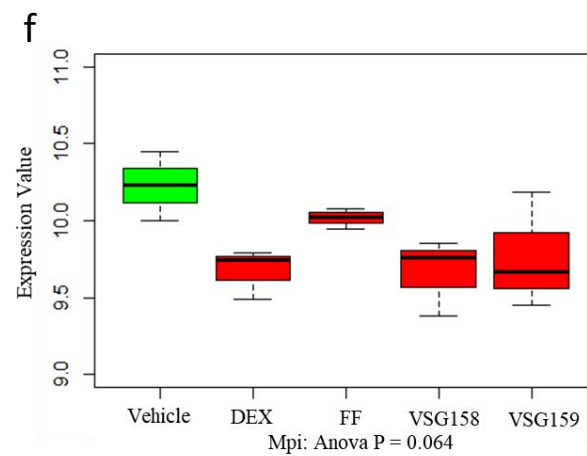

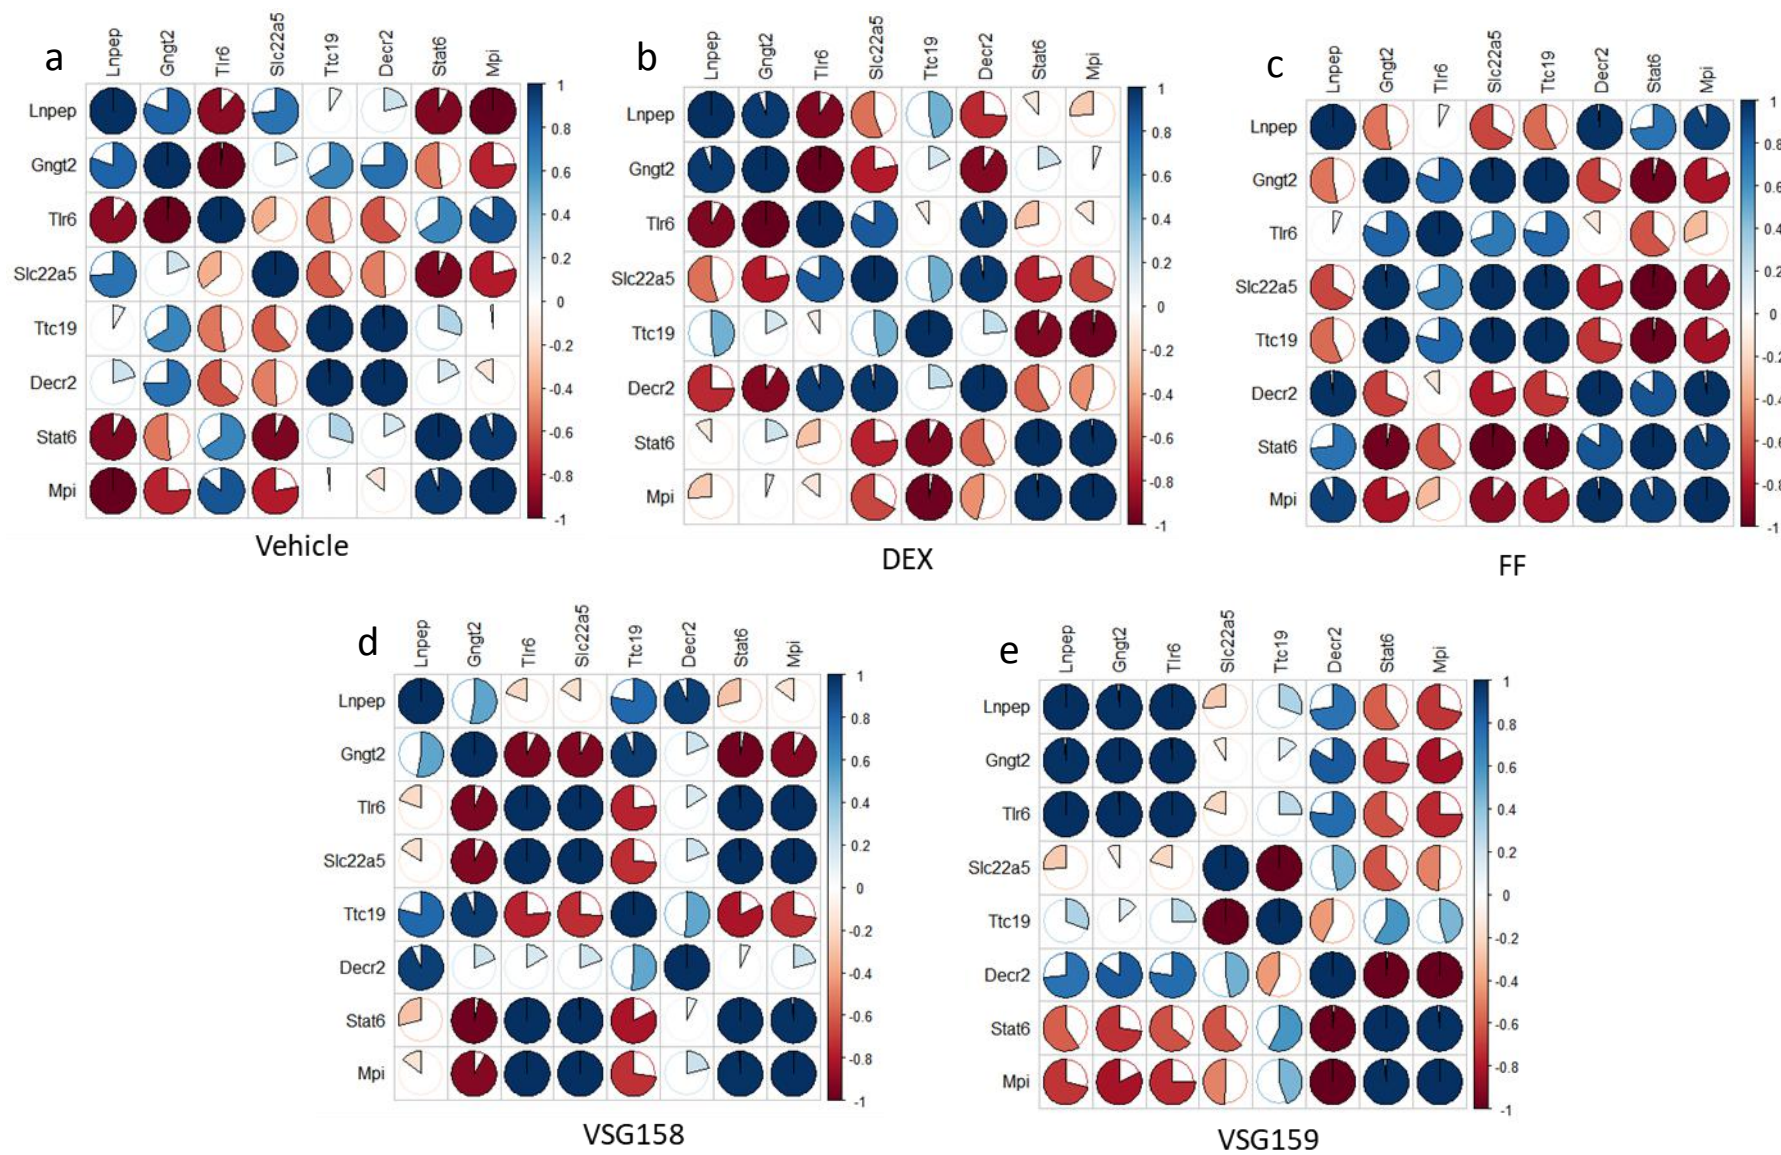

Supplemental Figure S4

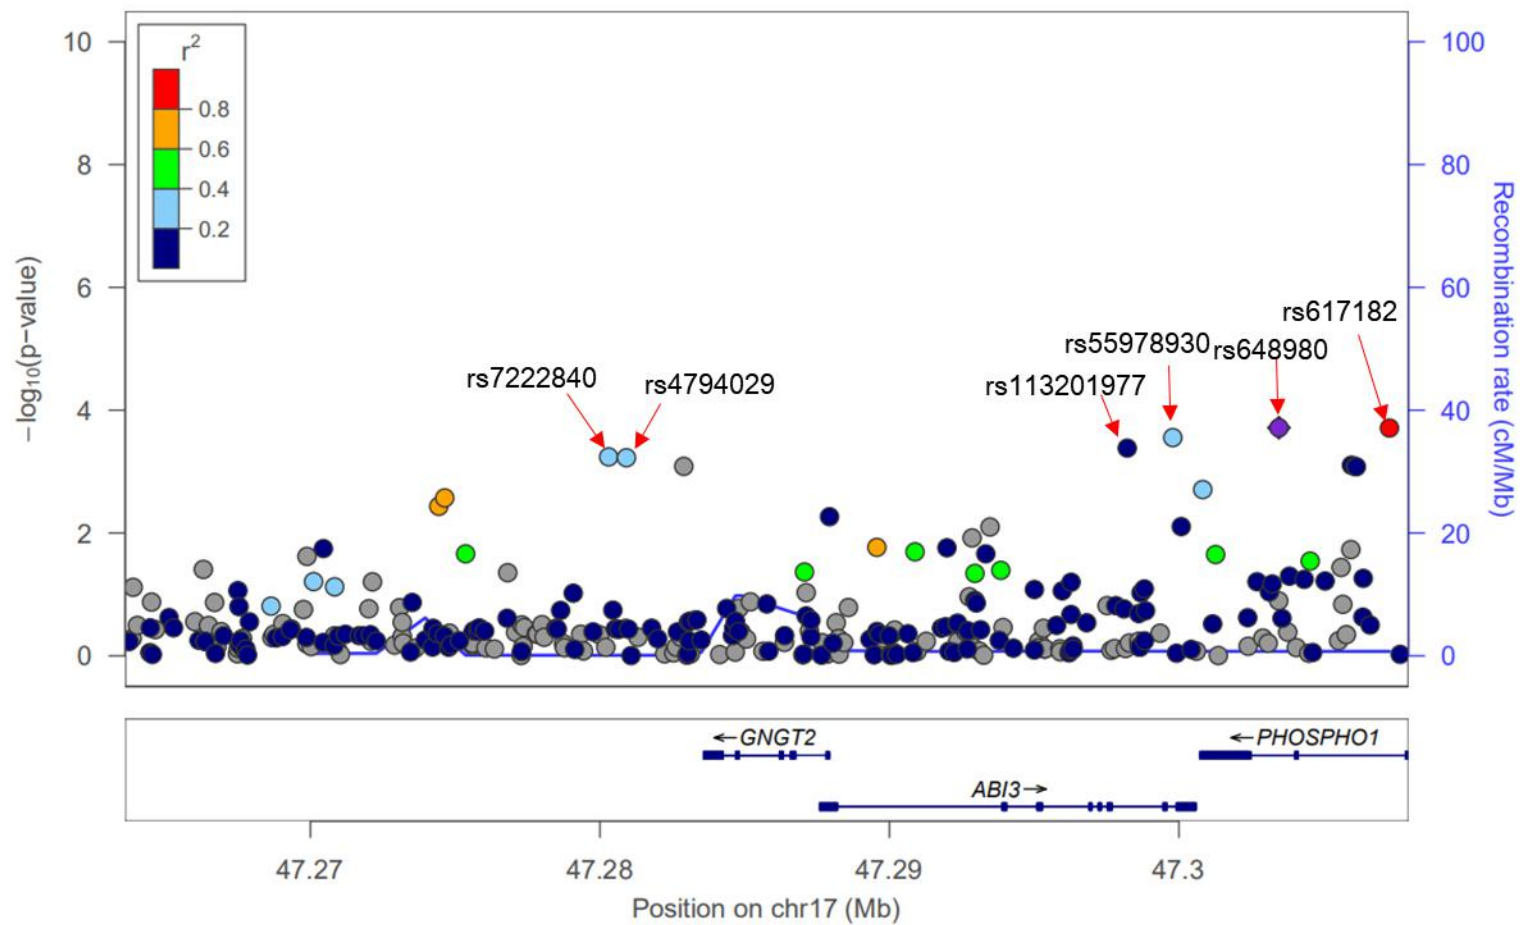

Supplemental Figure S5
